# Supplementary material for: Capturing the structural diversification upon thermal desolvation of a robust metal organic framework via a single-crystal-to-single-crystal transformation
Source: Royal Society of Chemistry journal article supplement (doi:10.1039/c5ce01116g), 2015-01-01
Supplement: c5ce01116g1.pdf [file c5ce01116g1.pdf]

# **Capturing the structural diversification upon thermal desolvation of a robust metal organic frameworks via a single-crystal-to-single-crystal transformation†**

Sandeep Kumar<sup>a</sup> and Sanjay K. Mandal<sup>a\*</sup>

*<sup>a</sup>Department of Chemical Sciences, Indian Institute of Science Education and Research, Mohali, Sector 81, Manauli PO, S.A.S. Nagar, Mohali (Punjab) 140306, INDIA*

## Supplementary Information

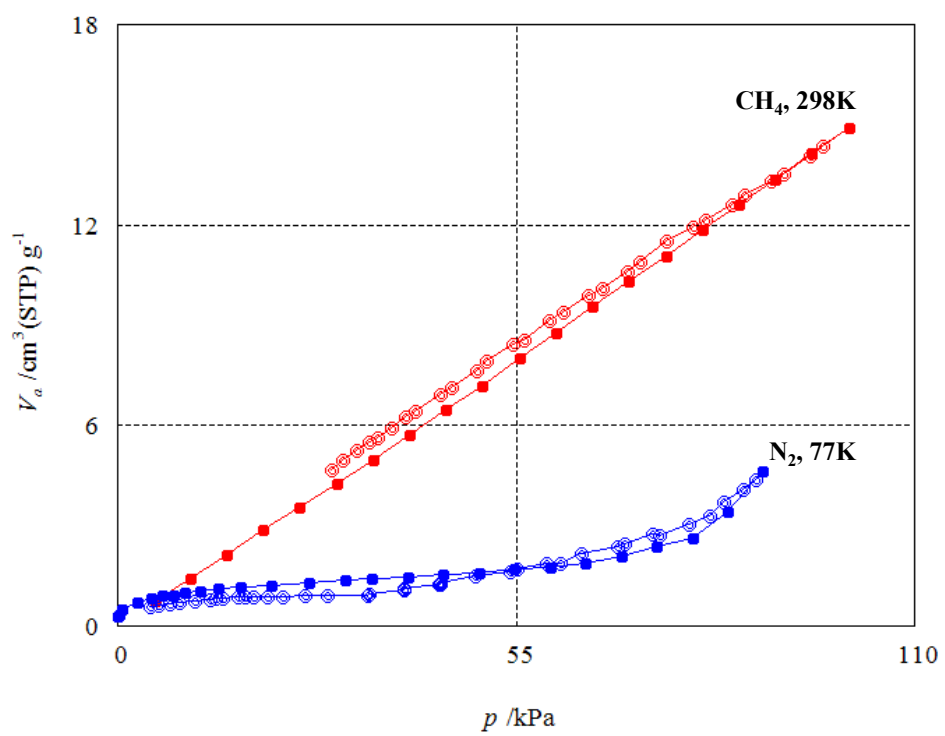

Fig S1. Gas adsorption isotherms for **2** (desolvated **1**). Filled squares, adsorption; circles, desorption.

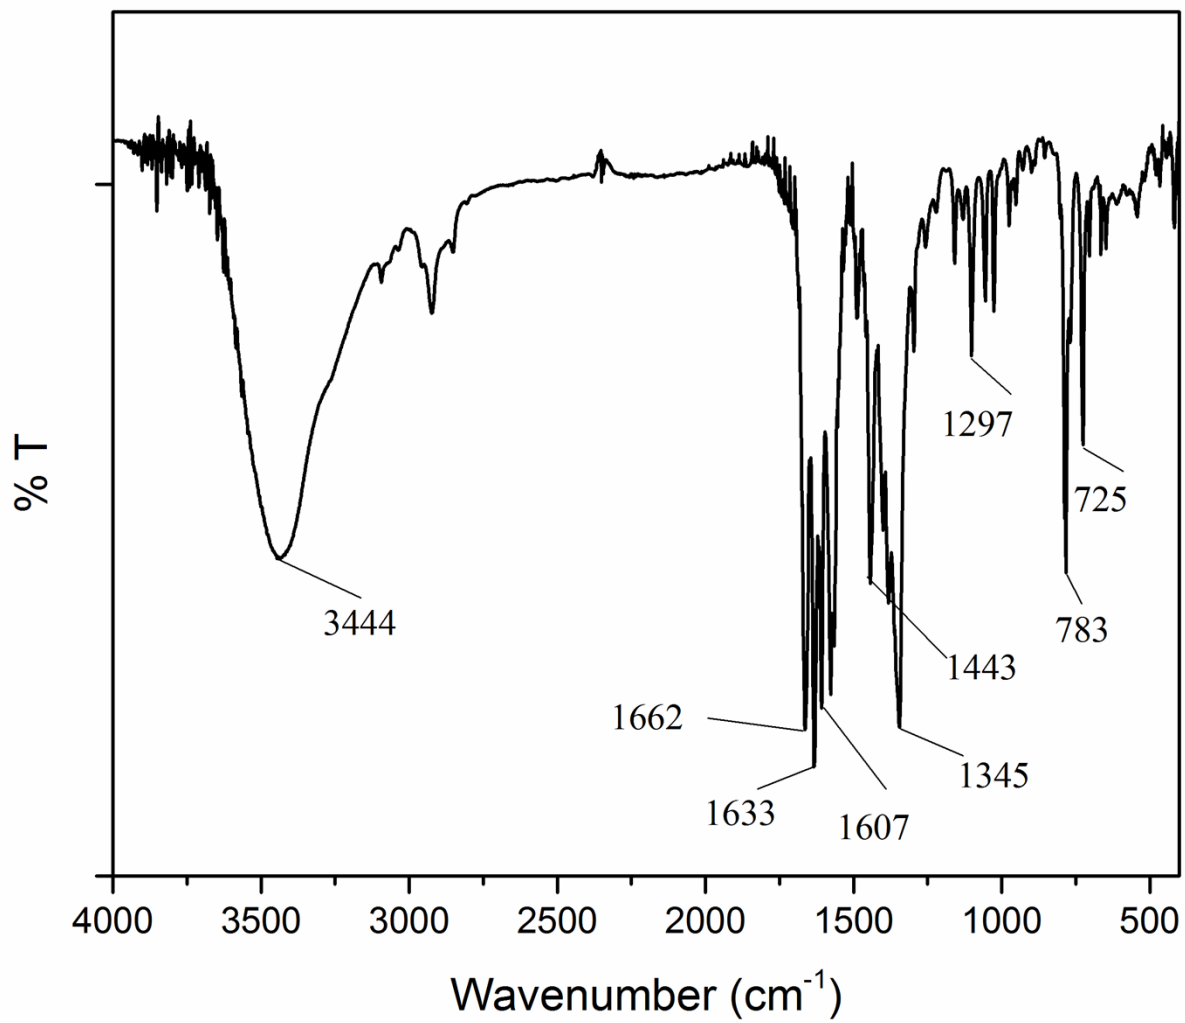

Fig S2. FTIR spectrum of 1.

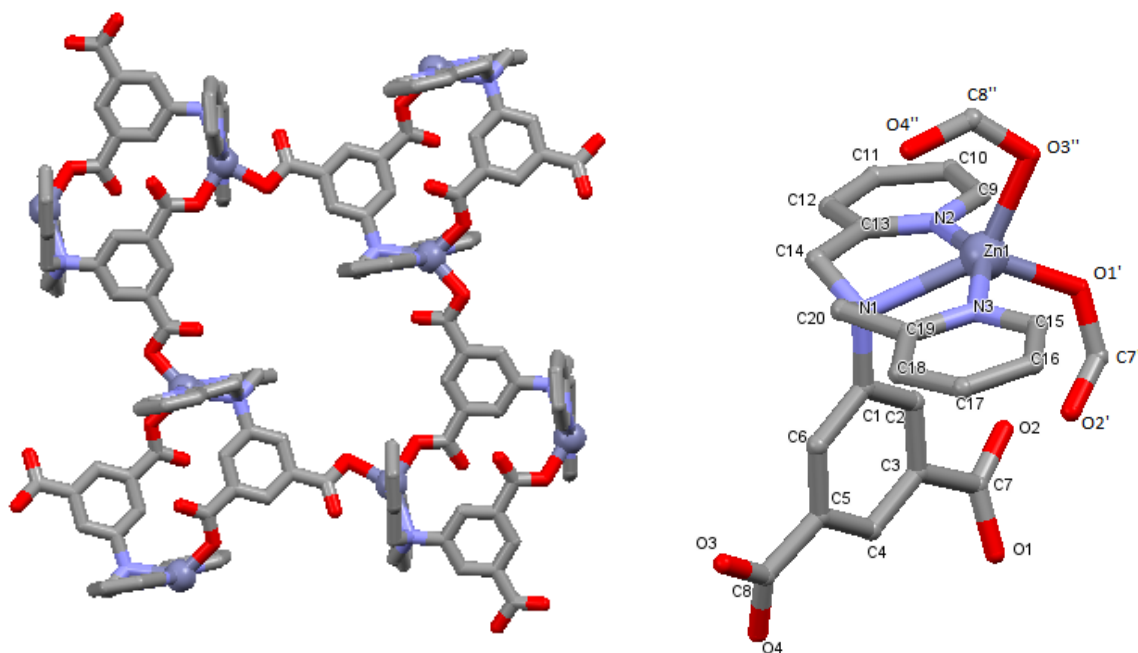

Fig S3. Crystal structure of **1** with the coordination environment around Zn shown on the right (symmetry codes for equivalent positions are: ' =  $-x, -y+1, -z+2$ ; '' =  $x+1/2, -y+3/2, z+1/2$ . Hydrogen atoms are omitted for clarity.

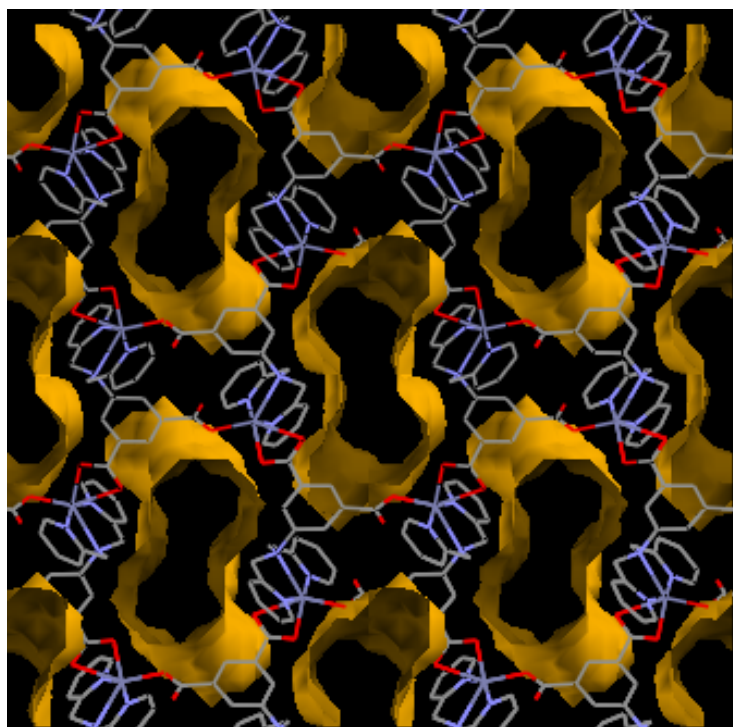

Fig S4. Schematic representation of the pores in **1** without the solvent molecules.

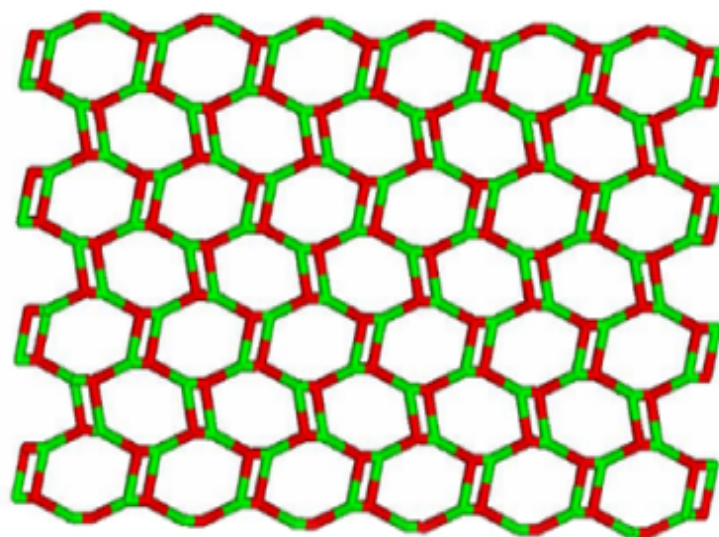

Fig S5. Topological view of **1**.

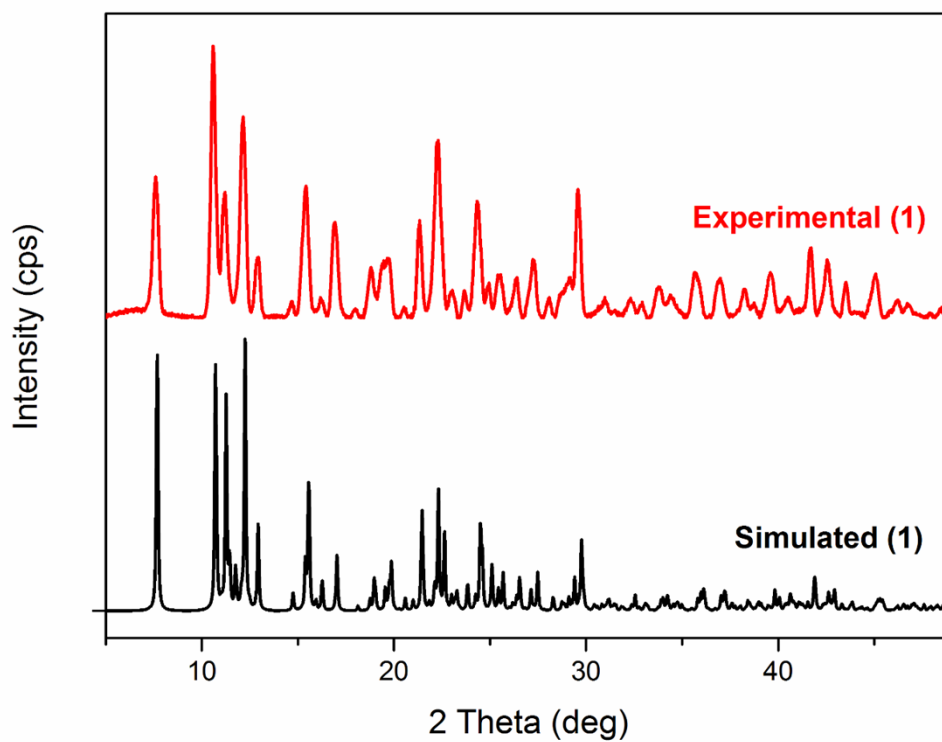

Fig S6. Simulated and experimental powder X-ray diffraction patterns of **1**.

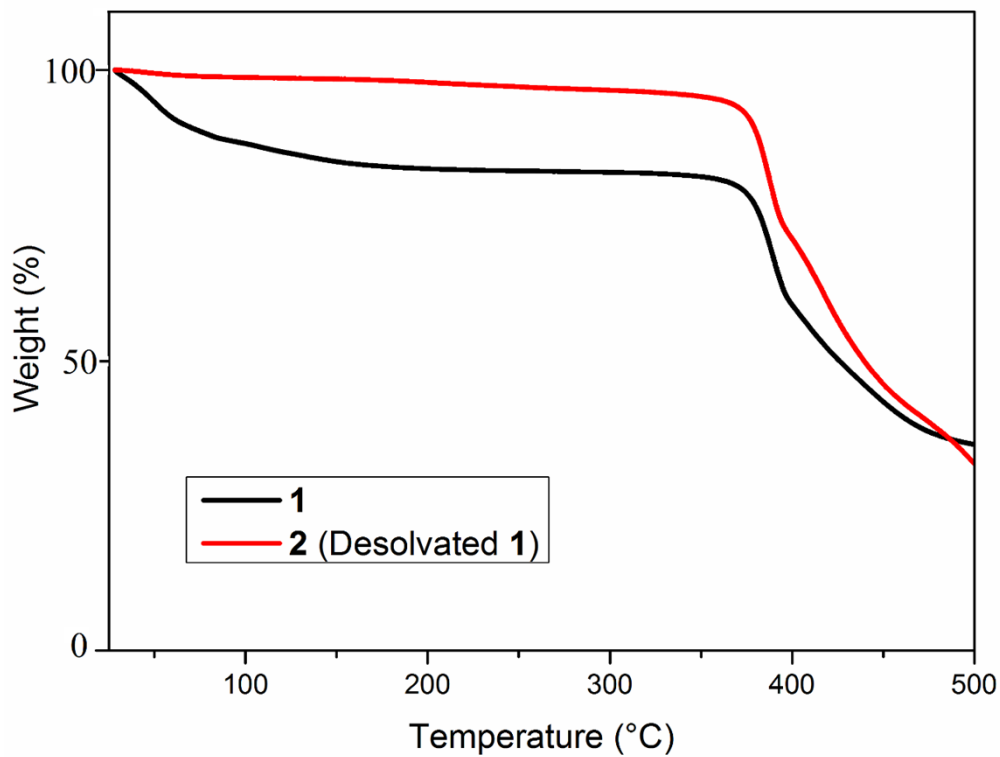

Fig S7. TGA scans of 1 and 2.

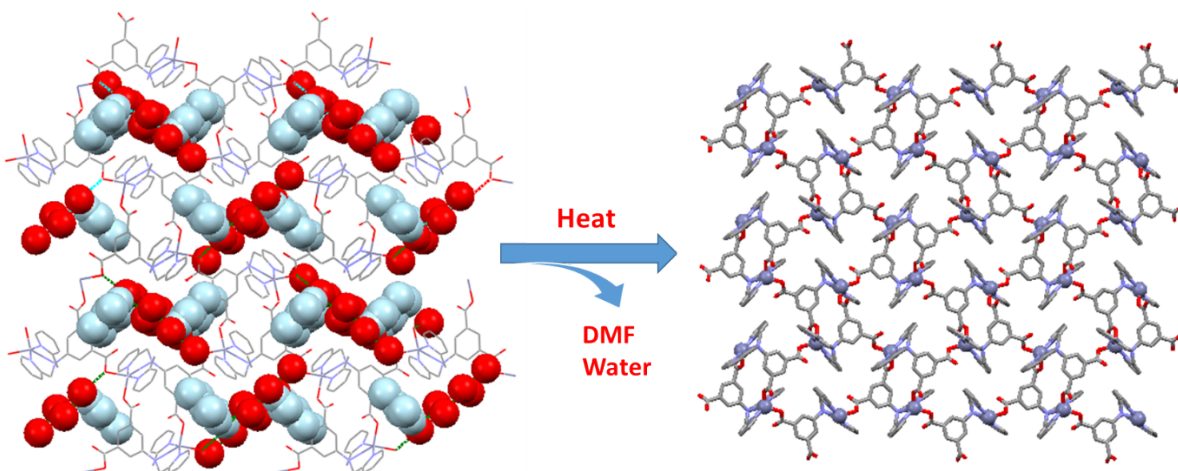

Fig S8. Schematic representation of the desolvation process (loss of DMF and water molecules in the pores) of 1 to 2.

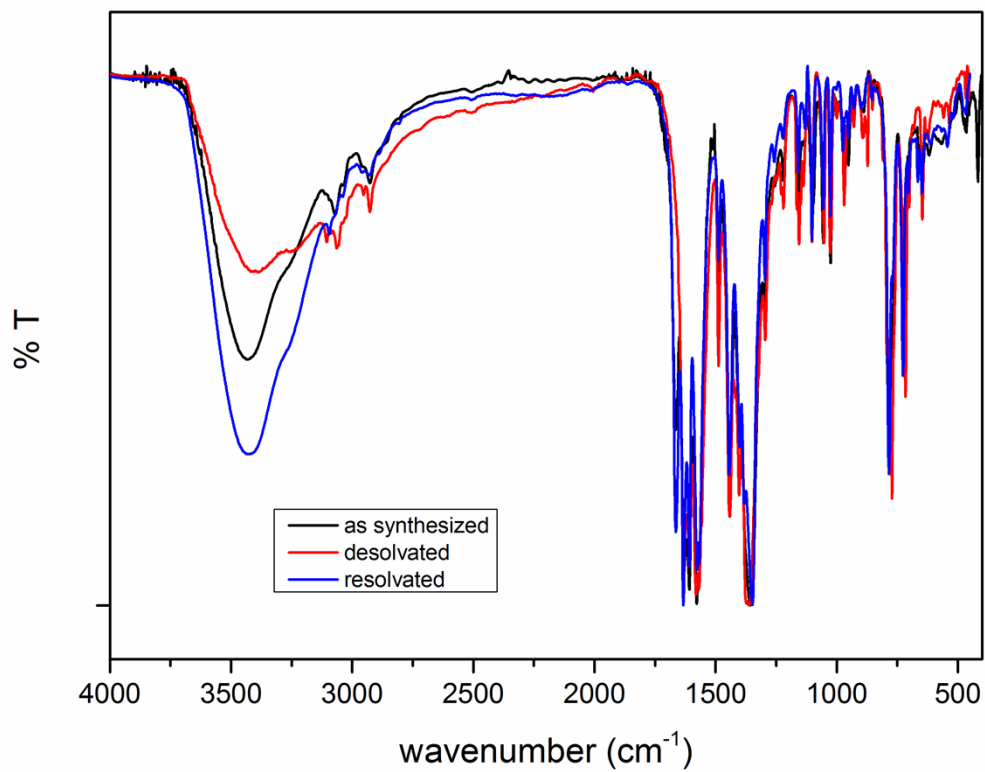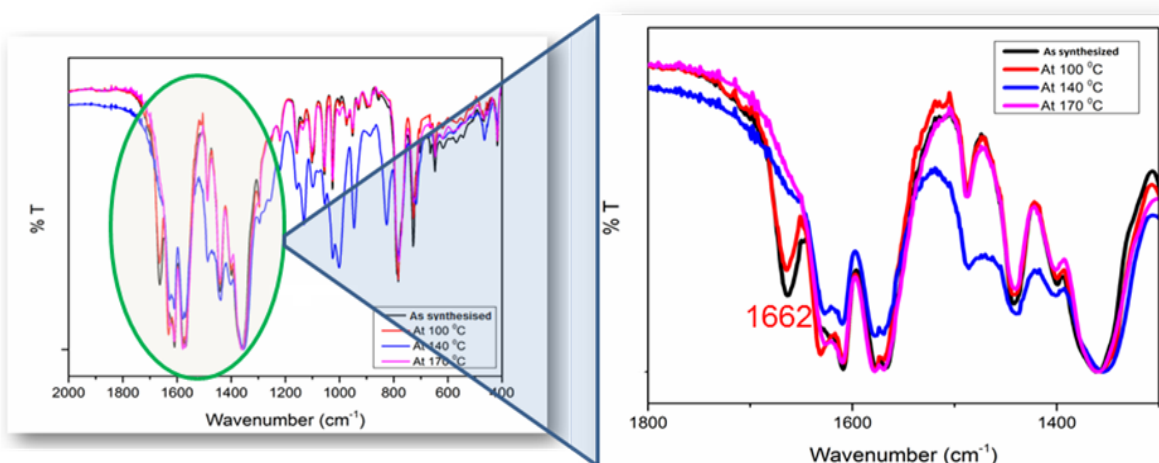

Fig S9. Monitoring of the desolvation (loss of DMF and water molecules in the pores) of **1** to **2** by FTIR spectroscopy. Note that only partial decrease in the intensity of the peak at  $3433\text{ cm}^{-1}$  due to water is observed because of the re-absorption of moisture during the recording of the spectrum under ambient condition with the ground sample having a lot more surface area. On the other hand, re-absorption of DMF by **2** to form **1** was found to indicate the reversibility of the process.

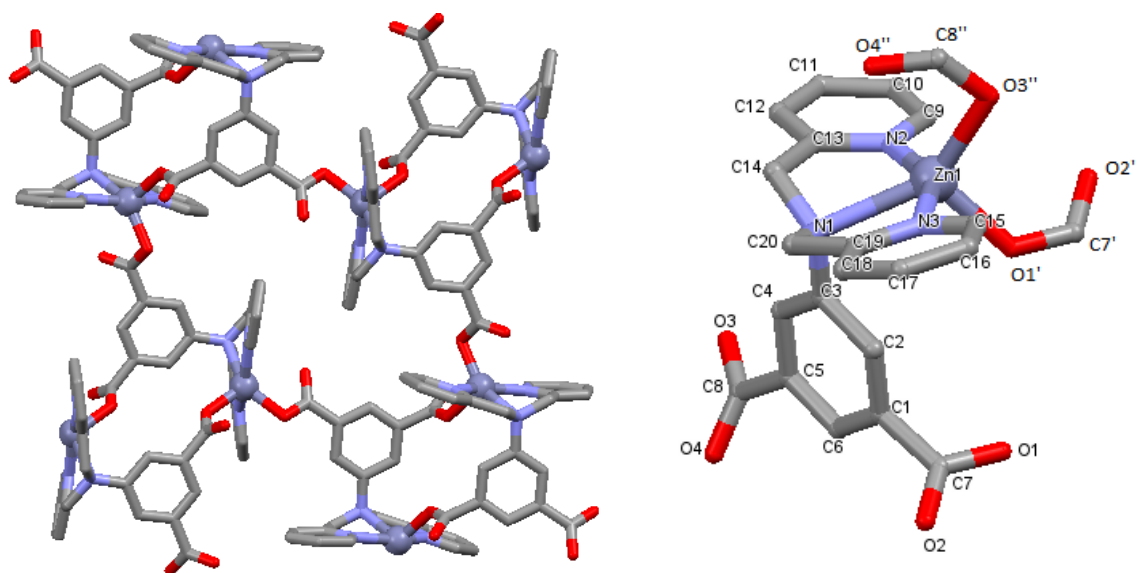

Fig S10. Crystal structure of **2** with the coordination environment around Zn shown on the right (symmetry codes for equivalent positions are: ' =  $-x, -y, -z+1$ ; " =  $x+1/2, -y+1/2, z-1/2$ ). Hydrogen atoms are omitted for clarity.

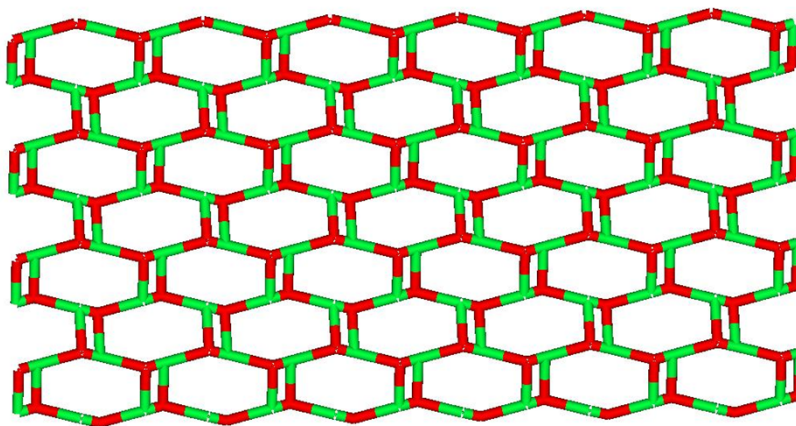

Fig S11. Topological view of **2**.



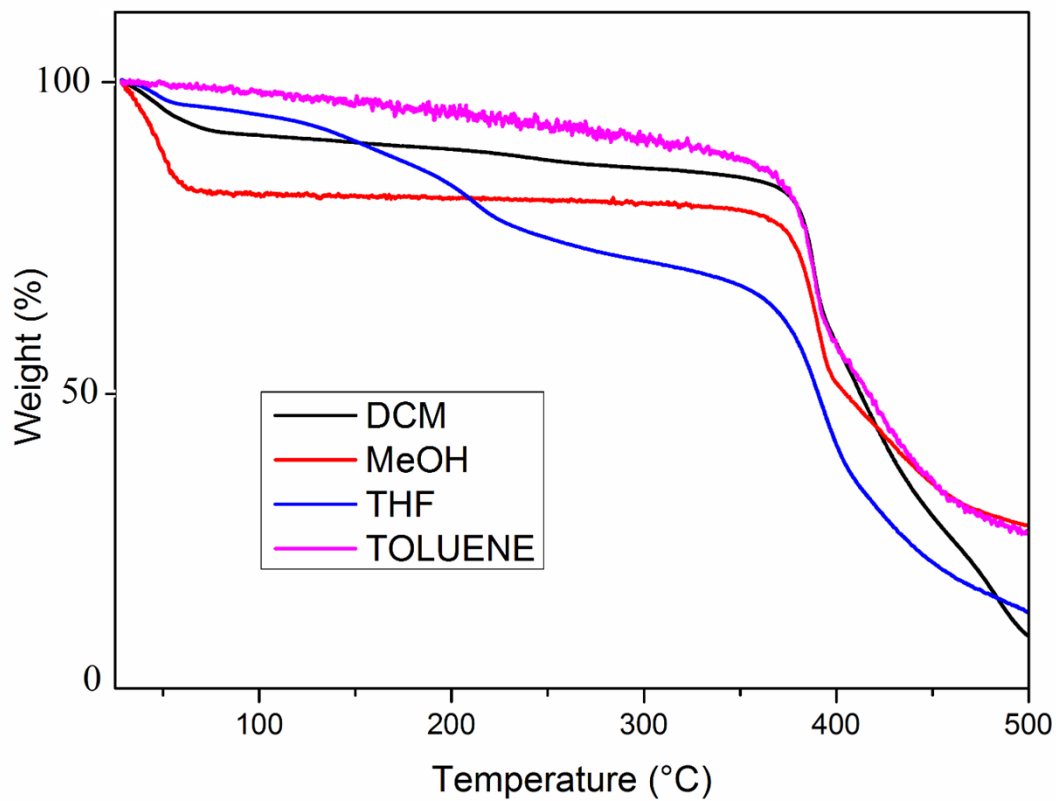

Fig S12. TGA scans of various solvates of 1.

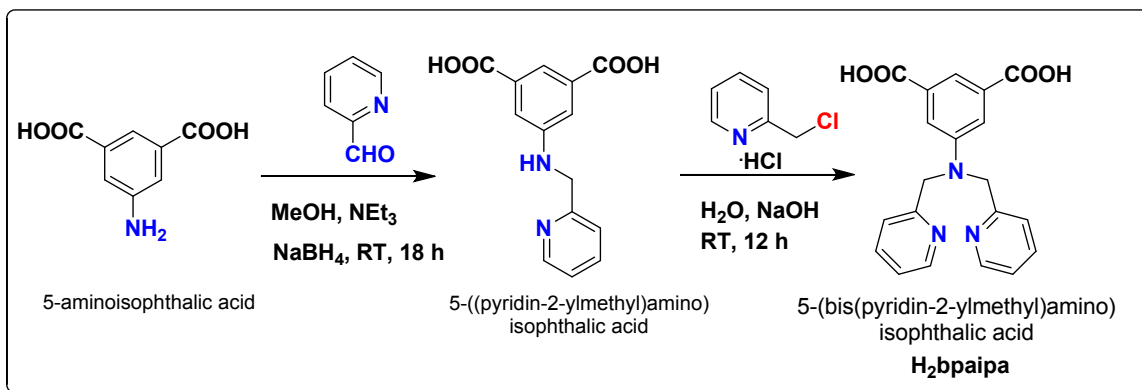

Scheme S1. Synthesis of H<sub>2</sub>bpaipa.

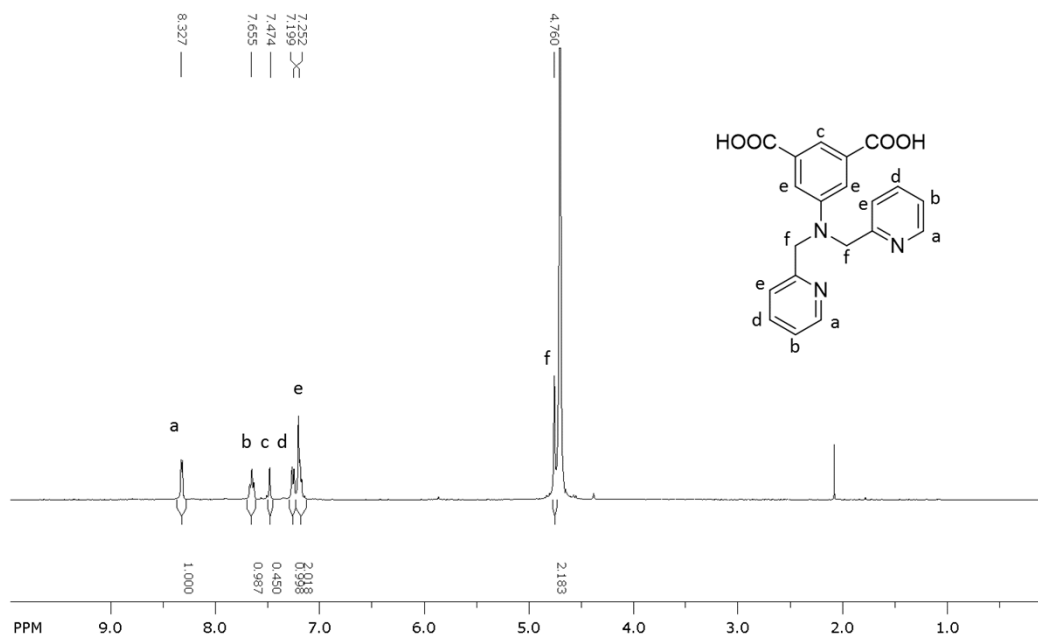

Fig S13. <sup>1</sup>H NMR spectrum of H<sub>2</sub>bpaipa in D<sub>2</sub>O.

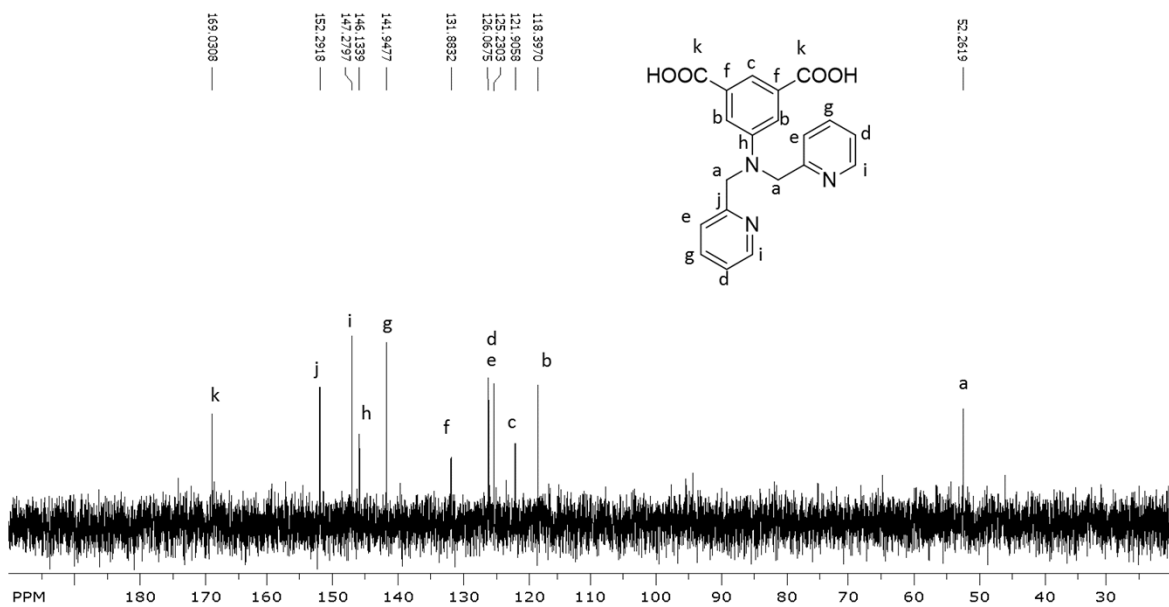

Fig S14. <sup>13</sup>C NMR spectrum of H<sub>2</sub>bpaipa in D<sub>2</sub>O.

Table S1. Crystallographic data and refinement parameters for **1** and **2**.

| Compound                                                                    | <b>1</b>                                                         | <b>2</b>                                                         |
|-----------------------------------------------------------------------------|------------------------------------------------------------------|------------------------------------------------------------------|
| Chemical Formula                                                            | C <sub>23</sub> H <sub>26</sub> N <sub>4</sub> O <sub>7</sub> Zn | C <sub>20</sub> H <sub>15</sub> N <sub>3</sub> O <sub>4</sub> Zn |
| Formula Weight                                                              | 535.85                                                           | 426.72                                                           |
| Temperature (K)                                                             | 100                                                              | 100                                                              |
| Wavelength (Å)                                                              | 0.71073                                                          | 0.71073                                                          |
| Crystal System                                                              | Monoclinic                                                       | Monoclinic                                                       |
| Space Group                                                                 | <i>P</i> 2 <sub>1</sub> / <i>n</i>                               | <i>P</i> 2 <sub>1</sub> / <i>n</i>                               |
| a (Å)                                                                       | 8.7542(8)                                                        | 8.485(5)                                                         |
| b (Å)                                                                       | 16.4242(15)                                                      | 14.529(9)                                                        |
| c (Å)                                                                       | 15.9879(15)                                                      | 14.073(8)                                                        |
| α (°)                                                                       | 90                                                               | 90                                                               |
| β (°)                                                                       | 91.709(2)                                                        | 94.11(3)                                                         |
| γ (°)                                                                       | 90                                                               | 90                                                               |
| Z                                                                           | 4                                                                | 4                                                                |
| V (Å <sup>3</sup> )                                                         | 2297.7(4)                                                        | 1730.4(17)                                                       |
| Density (mg/cm <sup>3</sup> )                                               | 1.549                                                            | 1.638                                                            |
| μ(mm <sup>-1</sup> )                                                        | 1.122                                                            | 1.454                                                            |
| F(000)                                                                      | 1112                                                             | 872                                                              |
| Theta (°) Range<br>for Data Coll.                                           | 1.78 to 25.00                                                    | 2.02 to 25.40                                                    |
| Reflections Collected                                                       | 12340                                                            | 8187                                                             |
| Independent Reflections                                                     | 4026                                                             | 3130                                                             |
| Reflections with I > 2σ(I)                                                  | 3076                                                             | 1399                                                             |
| R <sub>int</sub>                                                            | 0.0467                                                           | 0.138                                                            |
| No. of Parameters refined                                                   | 318                                                              | 253                                                              |
| GOF on F <sup>2</sup>                                                       | 1.091                                                            | 0.980                                                            |
| Final R <sub>1</sub> <sup>a</sup> /wR <sub>2</sub> <sup>b</sup> (I > 2σ(I)) | 0.0443/0.1123                                                    | 0.0817/0.1894                                                    |
| Weighted R <sub>1</sub> /wR <sub>2</sub> (all data)                         | 0.0606/0.1215                                                    | 0.1826/0.2307                                                    |
| Largest diff. peak<br>and hole(eÅ <sup>-3</sup> )                           | 0.704<br>and -0.722                                              | 0.768<br>and -0.473                                              |

<sup>a</sup>R<sub>1</sub> = Σ||F<sub>o</sub>| - |F<sub>c</sub>||/Σ|F<sub>o</sub>|. <sup>b</sup>wR<sub>2</sub> = [Σw(F<sub>o</sub><sup>2</sup> - F<sub>c</sub><sup>2</sup>)/Σw(F<sub>o</sub><sup>2</sup>)]<sup>1/2</sup>, where w = 1/[σ<sup>2</sup>(F<sub>o</sub><sup>2</sup>) + (aP)<sup>2</sup> + bP], P = (F<sub>o</sub><sup>2</sup> + 2F<sub>c</sub><sup>2</sup>)/3.

Table S2. Selected bond distances (Å) and angles (degree) for **1** and **2**.

**1**

**Bond Lengths (Å)**

|          |          |        |          |
|----------|----------|--------|----------|
| Zn1-O1'  | 1.989(2) | Zn1-N3 | 2.059(3) |
| Zn1-O3'' | 2.059(2) | Zn1-N2 | 2.088(3) |
| Zn1-N1   | 2.399(3) |        |          |

**Bond Angles (°)**

|             |            |              |           |
|-------------|------------|--------------|-----------|
| O1'-Zn1-N3  | 107.49(11) | O1'-Zn1-O3'' | 91.11(9)  |
| N3-Zn1-O3'' | 102.97(11) | O1'-Zn1-N2   | 93.18(11) |
| N3-Zn1-N2   | 150.47(11) | O3''-Zn1-N2  | 97.32(10) |
| O1'-Zn1-N1  | 130.53(10) | N3-Zn1-N1    | 75.50(10) |
| O3''-Zn1-N1 | 137.45(9)  | N2-Zn1-N1    | 75.04(10) |

Symmetry codes for equivalent positions are:

' = -x, -y+1, -z+2; '' = x+1/2, -y+3/2, z+1/2

**2**

**Bond Lengths (Å)**

|          |          |        |          |
|----------|----------|--------|----------|
| Zn1-O1'  | 1.938(7) | Zn1-N3 | 2.116(8) |
| Zn1-O3'' | 2.007(7) | Zn1-N2 | 2.065(9) |
| Zn1-N1   | 2.340(8) |        |          |

**Bond Angles (°)**

|             |          |              |          |
|-------------|----------|--------------|----------|
| O1'-Zn1-N3  | 92.5(3)  | O1'-Zn1-O3'' | 103.0(3) |
| N3-Zn1-O3'' | 89.3(3)  | O1'-Zn1-N2   | 107.4(3) |
| N3-Zn1-N2   | 149.2(3) | O3''-Zn1-N2  | 108.1(3) |
| O1'-Zn1-N1  | 113.8(3) | N3-Zn1-N1    | 74.9(3)  |
| O3''-Zn1-N1 | 140.1(3) | N2-Zn1-N1    | 75.7(3)  |

Symmetry codes for equivalent positions are:

' = -x, -y, -z+1; '' = x+1/2, -y+1/2, z-1/2
